# Supplementary material for: Bone and Joint Tissue Penetration of the Staphylococcus-Selective Antibiotic Afabicin in Patients Undergoing Elective Hip Replacement Surgery
Source: PubMed Central journal article supplement (PMC6395911; doi:10.1128/aac.01669-18), 2019-02-26
Supplement: AAC.01669-18-s0001.pdf [file AAC.01669-18-s0001.pdf]

Table S1: Individual replicates and median concentrations of afabacin desphosphono in cortical bone, cancellous bone, bone marrow and soft tissue collected at time of resection.

| Subject | Compartment     | Aliquot | Concentration (ng/g) |                | Median concentration (ng/g) |
|---------|-----------------|---------|----------------------|----------------|-----------------------------|
|         |                 |         | Replicate 1          | Replicate 2    |                             |
| 01      | Cortical bone   | 1a      | 201                  | 239            | <b>224</b>                  |
|         |                 | 1b      | 314                  | 346            |                             |
|         |                 | 2       | 178                  | 208            |                             |
| 01      | Cancellous bone | 1a      | 478                  | 577            | <b>497</b>                  |
|         |                 | 1b      | 468                  | 545            |                             |
|         |                 | 2       | 515                  | 295            |                             |
| 01      | Bone marrow     | 1a      | 401                  | 472            | <b>363</b>                  |
|         |                 | 1b      | 345                  | 365            |                             |
|         |                 | 2       | 361                  | 307            |                             |
| 01      | Soft tissue     | 1a      | 445                  | 364            | <b>473</b>                  |
|         |                 | 1b      | 540                  | 500            |                             |
|         |                 | 2       | 505                  | 420            |                             |
| 02      | Cortical bone   | 1a      | 472                  | 471            | <b>472</b>                  |
|         |                 | 1b      | 478                  | 491            |                             |
|         |                 | 2       | 419                  | 471            |                             |
| 02      | Cancellous bone | 1a      | 822                  | 848            | <b>739</b>                  |
|         |                 | 1b      | 497                  | 446            |                             |
|         |                 | 2       | 740                  | 737            |                             |
| 02      | Bone marrow     | 1a      | 527                  | 563            | <b>515</b>                  |
|         |                 | 1b      | 502                  | 483            |                             |
|         |                 | 2       | 566                  | 500            |                             |
| 02      | Soft tissue     | 1a      | 625                  | 674            | <b>617</b>                  |
|         |                 | 1b      | 699                  | 571            |                             |
|         |                 | 2       | 573                  | 609            |                             |
| 03      | Cortical bone   | 1a      | 504                  | 422            | <b>458</b>                  |
|         |                 | 1b      | 518                  | 493            |                             |
|         |                 | 2       | 270                  | 178            |                             |
| 03      | Cancellous bone | 1a      | 477                  | 596            | <b>590</b>                  |
|         |                 | 1b      | 349                  | 692            |                             |
|         |                 | 2       | 713                  | 583            |                             |
| 03      | Bone marrow     | 1a      | 745                  | 637            | <b>609</b>                  |
|         |                 | 1b      | 594                  | 623            |                             |
|         |                 | 2       | 588                  | 347            |                             |
| 03      | Soft tissue     | 1a      | 498                  | 436            | <b>467</b>                  |
|         |                 | 1b      | 639                  | 673            |                             |
|         |                 | 2       | 398                  | 353            |                             |
| 04      | Cortical bone   | 1       | 730                  | 635            | <b>683</b>                  |
| 04      | Cancellous bone | 1       | 1060                 | 1240           | <b>1020</b>                 |
|         |                 | 2       | 984                  | 892            |                             |
| 04      | Bone marrow     | 1       | 612                  | 825            | <b>825</b>                  |
|         |                 | 2       | 932                  | - <sup>a</sup> |                             |
| 04      | Soft tissue     | 1       | 477                  | 436            | <b>457</b>                  |
| 05      | Cortical bone   | 1       | 590                  | 571            | <b>581</b>                  |
| 05      | Cancellous bone | 1       | 953                  | 1080           | <b>1020</b>                 |

| Subject | Compartment     | Aliquot | Concentration (ng/g) |               | Median concentration (ng/g) |
|---------|-----------------|---------|----------------------|---------------|-----------------------------|
|         |                 |         | Replicate 1          | Replicate 2   |                             |
| 05      | Bone marrow     | 1       | 875                  | 853           | <b>864</b>                  |
| 05      | Soft tissue     | 1       | 640                  | 670           | <b>655</b>                  |
| 06      | Cortical bone   | 1       | 176                  | 183           | <b>180</b>                  |
| 06      | Cancellous bone | 1a      | 601                  | 264           | <b>599</b>                  |
|         |                 | 1b      | 623                  | 597           |                             |
| 06      | Bone marrow     | 1       | 236                  | 299           | <b>268</b>                  |
| 06      | Soft tissue     | 1       | 296                  | 370           | <b>333</b>                  |
| 07      | Cortical bone   | 1       | 191                  | 196           | <b>283</b>                  |
|         |                 | 2       | 370                  | 378           |                             |
| 07      | Cancellous bone | 1       | 434                  | 435           | <b>435</b>                  |
| 07      | Bone marrow     | 1       | 319                  | 309           | <b>314</b>                  |
| 07      | Soft tissue     | 1       | 455                  | 416           | <b>436</b>                  |
| 08      | Cortical bone   | NA      |                      |               | <b>NA</b>                   |
| 08      | Cancellous bone | NA      |                      |               | <b>NA</b>                   |
| 08      | Bone marrow     | NA      |                      |               | <b>NA</b>                   |
| 08      | Soft tissue     | NA      |                      |               | <b>NA</b>                   |
| 09      | Cortical bone   | 1       | 333                  | 413           | <b>373</b>                  |
| 09      | Cancellous bone | 1a      | 368                  | 3530          | <b>505</b>                  |
|         |                 | 1b      | 442                  | 567           |                             |
| 09      | Bone marrow     | 1       | 485                  | 484           | <b>485</b>                  |
| 09      | Soft tissue     | 1       | 357                  | 376           | <b>367</b>                  |
| 10      | Cortical bone   | 1       | 348                  | 327           | <b>338</b>                  |
|         |                 | 2       | NA                   | NA            |                             |
| 10      | Cancellous bone | 1a      | 1620                 | 743           | <b>913</b>                  |
|         |                 | 1b      | 964                  | 862           |                             |
| 10      | Bone marrow     | 1       | 778                  | 751           | <b>765</b>                  |
| 10      | Soft tissue     | 1       | 724                  | 814           | <b>769</b>                  |
| 11      | Cortical bone   | 1       | 197                  | 193           | <b>195</b>                  |
|         |                 | 2       | 198                  | 190           |                             |
| 11      | Cancellous bone | 1       | 462                  | 444           | <b>453</b>                  |
| 11      | Bone marrow     | 1       | 500                  | 497           | <b>499</b>                  |
| 11      | Soft tissue     | 1       | 410                  | 540           | <b>475</b>                  |
|         |                 | 1b      | <sub>-a</sub>        | <sub>-a</sub> |                             |
| 12      | Cortical bone   | 1       | 533                  | 543           | <b>538</b>                  |
| 12      | Cancellous bone | 1       | 867                  | 899           | <b>883</b>                  |
| 12      | Bone marrow     | 1       | 845                  | 858           | <b>852</b>                  |
| 12      | Soft tissue     | 1       | 913                  | 930           | <b>922</b>                  |
| 13      | Cortical bone   | NA      |                      |               | <b>NA</b>                   |
| 13      | Cancellous bone | NA      |                      |               | <b>NA</b>                   |

| Subject | Compartment     | Aliquot | Concentration (ng/g) |                | Median concentration (ng/g) |
|---------|-----------------|---------|----------------------|----------------|-----------------------------|
|         |                 |         | Replicate 1          | Replicate 2    |                             |
| 13      | Bone marrow     | 1       | 1180                 | - <sup>a</sup> | <b>1180</b>                 |
| 13      | Soft tissue     | 1       | 1060                 | 1040           | <b>1050</b>                 |
| 14      | Cortical bone   | 1       | 152                  | 143            | <b>148</b>                  |
| 14      | Cancellous bone | 1       | 516                  | 466            | <b>468</b>                  |
|         |                 | 2       | 430                  | 469            |                             |
| 14      | Bone marrow     | 1       | 359                  | 383            | <b>363</b>                  |
|         |                 | 2       | 367                  | 344            |                             |
| 14      | Soft tissue     | 1       | 343                  | 278            | <b>303</b>                  |
|         |                 | 2       | 274                  | 328            |                             |

NA: no sample available; 1a and 1b: same aliquot (1) analysed in separate batches; <sup>a</sup>No sufficient tissue for two replicates for reassay.

Following analysis of replicates for the two aliquots of the first patients, the differences between some of the replicates was higher than 25% in some cases. Consequently, aliquot 1 was analysed in duplicates for all patients in one run; if the difference between the duplicates ( $100 \cdot [\text{Replicate 1} - \text{Replicate 2} / \text{mean}]$ ) was higher than 25%, a reanalysis was conducted in duplicates. In addition, if the mean of the two replicates was higher than 50% of the median value of all tissues, reanalysis of the aliquot 1 and analysis of aliquot 2 were performed in duplicates. These repeat analyses were done to increase the accuracy of tissue concentration data.

The median of all the replicates is reported as recommended by the Global Bioanalysis Consortium Harmonization Team [1].

## Reference

**1 Fluhler E, Vazvaei F, Singhal P, Vinck P, Li W, Bhatt J, de Boer T, Chaudhary A, Tangiuchi M, Rezende V, Zhong D. 2014. Repeat Analysis and Incurred Sample Reanalysis: Recommendation for Best Practices and Harmonization from the Global Bioanalysis Consortium Harmonization Team. AAPS J. 16(6):1167-1174.**
